# Supplementary material
Source: publisher figshare collection journal article supplement (https://sage.figshare.com/ndownloader/files/18737207)
Supplement: Supplementary file 1 [file 18737207]

# Study 1 Materials

## Goals Writing Prompt

Think about the most important goal in your life that you are currently making progress toward. Please write a few sentences about what the goal is, the steps you have successfully taken toward achieving the goal, and the steps you plan to take toward achieving the goal.

---

---

---

---

---

How motivated are you to accomplish this goal?

Not at all    Somewhat    Moderately    Extremely

0    10    20    30    40    50    60    70    80    90    100

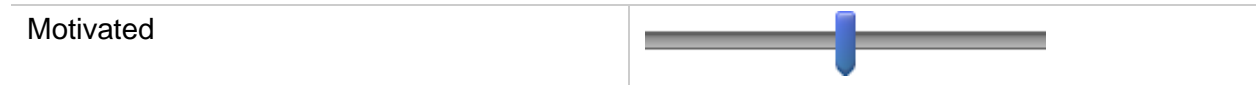

Please indicate your level of agreement with the following items in terms of how you feel right now, at this moment. Do not think about the past, the future, or giving the "correct" answer. Let your answers reflect your current mood IN THIS MOMENT.

|                                                                 | Not at all            | A little bit          | A fair amount         | Moderately            | Strongly              | Absolutely            |
|-----------------------------------------------------------------|-----------------------|-----------------------|-----------------------|-----------------------|-----------------------|-----------------------|
| There is a direction in my life                                 | <input type="radio"/> |
| My plans for the future match with my true interests and values | <input type="radio"/> |
| I know which direction I am going to follow in my life          | <input type="radio"/> |
| My life is guided by a set of clear commitments                 | <input type="radio"/> |

Now we have a few demographic questions to ask.

---

Are you currently in a committed romantic relationship?

- No
- Yes
- Prefer not to say



How would you BEST describe your current religious outlook?

- Atheist
- Agnostic
- Catholic
- Christian (non-Catholic)
- Muslim
- Jewish
- Buddhist
- Spiritual but not Religious
- Hindu
- None (Religious but unaffiliated)
- Other \_\_\_\_\_

---

Please enter your specific religious identity below (e.g., Eastern Orthodox, Pentecostal, etc.)

---

How would you describe the religious or spiritual outlook in your <strong>childhood home</strong>?

- Anti-religion and spirituality
  - Not religious or spiritual
  - A little religious or spiritual
  - Moderately religious or spiritual
  - Extremely religious or spiritual
- 

How old are you?

\_\_\_\_\_

---

What is your gender?

- Male
  - Female
  - Other \_\_\_\_\_
- 

What is your sexual orientation?

- Straight
  - Gay/Lesbian
  - Other \_\_\_\_\_
-

How would you BEST describe your ethnicity?

- Caucasian or White
  - African-American or Black
  - Hispanic, Latino, or Chicano
  - East Asian
  - South Asian
  - Middle Eastern
  - Multiple
  - Other \_\_\_\_\_
- 

How would you describe your social economic class?

- Lower or working class
  - Lower middle class
  - Middle class
  - Upper middle class
  - Upper class
-

How would you describe your general political viewpoint?

- Very liberal
- Liberal
- Somewhat Liberal
- Moderate
- Somewhat Conservative
- Conservative
- Very Conservative

How well do you understand English?

- I do not speak English
- I understand most English words
- I am fluent in English

Here is what you wrote regarding an important goal that you are currently working toward **[piped text from writing activity]**.

Below you will see a list of basic motivations and their definitions. For each motivation seen below, indicate whether it drives you to accomplish your chosen goal above. For instance, if the







## Study 2 Materials

Please indicate how true these statements are of you AT THIS MOMENT, not as you were or wish you could be.

|                                                                  | Strongly disagree     | Somewhat disagree     | Neither agree nor disagree | Somewhat agree        | Strongly agree        |
|------------------------------------------------------------------|-----------------------|-----------------------|----------------------------|-----------------------|-----------------------|
| There is a direction in my life.                                 | <input type="radio"/> | <input type="radio"/> | <input type="radio"/>      | <input type="radio"/> | <input type="radio"/> |
| My plans for the future match with my true interests and values. | <input type="radio"/> | <input type="radio"/> | <input type="radio"/>      | <input type="radio"/> | <input type="radio"/> |
| I know which direction I am going to follow in my life.          | <input type="radio"/> | <input type="radio"/> | <input type="radio"/>      | <input type="radio"/> | <input type="radio"/> |
| My life is guided by a set of clear commitments.                 | <input type="radio"/> | <input type="radio"/> | <input type="radio"/>      | <input type="radio"/> | <input type="radio"/> |

Are you currently in a committed romantic relationship?

Yes

No

How many children do you have?

- None
- One
- Two
- Three
- Four
- Five
- Six
- Seven or more

We are interested in whether the following statements are true of you at this point in your life. Please answer how well the questions apply to you in general now, not whether these have been true of you in the past or may be true in the future. For each question, think about the

extent to which you agree or disagree with the statement. (1 = strongly disagree, 7 = strongly agree)

















I often think about how I could stop bad things from happening to my children

I rarely think about protecting my children

Providing for my children is important to me

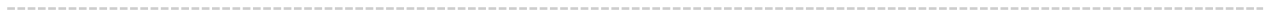

How old are you?

---

What is your gender?

Male

Female

Other \_\_\_\_\_

## Study 3 Materials

Q5 Are you currently in a romantic relationship?

- No (1)
- Yes (2)
- Prefer not to say (3)
- 

Q7 Do you have any children?

- No (1)
- Yes (2)
- Prefer not to say (3)
- 

*Display This Question:*

*If Do you have any children? = Yes*

Q54 How old is your youngest child?

\_\_\_\_\_

---

*Display This Question:*

*If Do you have any children? = Yes*

Q62 How many children do you have?

\_\_\_\_\_

---

age What is your age in years?

\_\_\_\_\_

End of Block: kidsetc

---

Start of Block: Covariates

Page Break

---



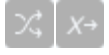

AppAvoid Indicate the extent to which you agree or disagree with the following statements using the scale provided.



I'm always on the lookout for positive opportunities and experiences.  
(AppAvoid\_8)

When it looks like something bad could happen, I have a strong urge to escape.  
(AppAvoid\_9)

When good things happen to me, it affects me very strongly.  
(AppAvoid\_10)

When I want something, I feel a strong desire to go after it.  
(AppAvoid\_11)

It is easy for me to imagine bad things that might happen to me.  
(AppAvoid\_12)

Select "strongly disagree" here as an attention check.  
(AppAvoid\_13)

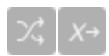

promotion Indicate the extent to which the following statements are true or untrue of you using the scale provided.













panas This scale consists of a number of words that describe different feelings and emotions. Read each item and then select the appropriate answer in the space provided. Indicate to what extent you feel this way right now.

|                           | Very slightly<br>or not at all<br>(1) | A little (2)          | Moderately<br>(3)     | Quite a bit<br>(4)    | Extremely (5)         |
|---------------------------|---------------------------------------|-----------------------|-----------------------|-----------------------|-----------------------|
| Interested<br>(PANAS_1)   | <input type="radio"/>                 | <input type="radio"/> | <input type="radio"/> | <input type="radio"/> | <input type="radio"/> |
| Distressed<br>(PANAS_2)   | <input type="radio"/>                 | <input type="radio"/> | <input type="radio"/> | <input type="radio"/> | <input type="radio"/> |
| Excited<br>(PANAS_3)      | <input type="radio"/>                 | <input type="radio"/> | <input type="radio"/> | <input type="radio"/> | <input type="radio"/> |
| Upset<br>(PANAS_4)        | <input type="radio"/>                 | <input type="radio"/> | <input type="radio"/> | <input type="radio"/> | <input type="radio"/> |
| Strong<br>(PANAS_5)       | <input type="radio"/>                 | <input type="radio"/> | <input type="radio"/> | <input type="radio"/> | <input type="radio"/> |
| Guilty<br>(PANAS_6)       | <input type="radio"/>                 | <input type="radio"/> | <input type="radio"/> | <input type="radio"/> | <input type="radio"/> |
| Scared<br>(PANAS_7)       | <input type="radio"/>                 | <input type="radio"/> | <input type="radio"/> | <input type="radio"/> | <input type="radio"/> |
| Hostile<br>(PANAS_8)      | <input type="radio"/>                 | <input type="radio"/> | <input type="radio"/> | <input type="radio"/> | <input type="radio"/> |
| Enthusiastic<br>(PANAS_9) | <input type="radio"/>                 | <input type="radio"/> | <input type="radio"/> | <input type="radio"/> | <input type="radio"/> |
| Proud<br>(PANAS_10)       | <input type="radio"/>                 | <input type="radio"/> | <input type="radio"/> | <input type="radio"/> | <input type="radio"/> |
| Irritable<br>(PANAS_11)   | <input type="radio"/>                 | <input type="radio"/> | <input type="radio"/> | <input type="radio"/> | <input type="radio"/> |
| Alert<br>(PANAS_12)       | <input type="radio"/>                 | <input type="radio"/> | <input type="radio"/> | <input type="radio"/> | <input type="radio"/> |
| Ashamed<br>(PANAS_13)     | <input type="radio"/>                 | <input type="radio"/> | <input type="radio"/> | <input type="radio"/> | <input type="radio"/> |
| Inspired<br>(PANAS_14)    | <input type="radio"/>                 | <input type="radio"/> | <input type="radio"/> | <input type="radio"/> | <input type="radio"/> |
| Nervous<br>(PANAS_15)     | <input type="radio"/>                 | <input type="radio"/> | <input type="radio"/> | <input type="radio"/> | <input type="radio"/> |

|                          |                       |                       |                       |                       |                       |
|--------------------------|-----------------------|-----------------------|-----------------------|-----------------------|-----------------------|
| Determined<br>(PANAS_16) | <input type="radio"/> |
| Attentive<br>(PANAS_17)  | <input type="radio"/> |
| Jittery<br>(PANAS_18)    | <input type="radio"/> |
| Active<br>(PANAS_19)     | <input type="radio"/> |
| Afraid<br>(PANAS_20)     | <input type="radio"/> |

End of Block: Covariates

---

Start of Block: BFI-44

Q82 Here are a number of characteristics that may or may not apply to you. For example, do you agree that you are someone who likes to spend time with others? Please indicate the extent to which you agree with each statement, "I see myself as someone who..."

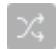

Q84 "I see myself as someone who..."

|                                                     | Strongly disagree (1) | Somewhat disagree (2) | Neither agree nor disagree (3) | Somewhat agree (4)    | Strongly agree (5)    |
|-----------------------------------------------------|-----------------------|-----------------------|--------------------------------|-----------------------|-----------------------|
| Tends to find fault with others (agree1r)           | <input type="radio"/> | <input type="radio"/> | <input type="radio"/>          | <input type="radio"/> | <input type="radio"/> |
| Is helpful and unselfish with others (agree2)       | <input type="radio"/> | <input type="radio"/> | <input type="radio"/>          | <input type="radio"/> | <input type="radio"/> |
| Starts quarrels with others (agree3r)               | <input type="radio"/> | <input type="radio"/> | <input type="radio"/>          | <input type="radio"/> | <input type="radio"/> |
| Has a forgiving nature (agree4)                     | <input type="radio"/> | <input type="radio"/> | <input type="radio"/>          | <input type="radio"/> | <input type="radio"/> |
| Is generally trusting (agree5)                      | <input type="radio"/> | <input type="radio"/> | <input type="radio"/>          | <input type="radio"/> | <input type="radio"/> |
| Can be cold and aloof (agree6r)                     | <input type="radio"/> | <input type="radio"/> | <input type="radio"/>          | <input type="radio"/> | <input type="radio"/> |
| Is considerate and kind to almost everyone (agree7) | <input type="radio"/> | <input type="radio"/> | <input type="radio"/>          | <input type="radio"/> | <input type="radio"/> |
| Is sometimes rude to others (agree8r)               | <input type="radio"/> | <input type="radio"/> | <input type="radio"/>          | <input type="radio"/> | <input type="radio"/> |
| Likes to cooperate with others (agree9)             | <input type="radio"/> | <input type="radio"/> | <input type="radio"/>          | <input type="radio"/> | <input type="radio"/> |

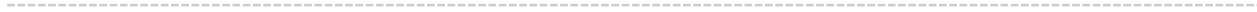

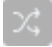

Q86 "I see myself as someone who..."

|                                                   | Strongly disagree (1) | Somewhat disagree (2) | Neither agree nor disagree (3) | Somewhat agree (4)    | Strongly agree (5)    |
|---------------------------------------------------|-----------------------|-----------------------|--------------------------------|-----------------------|-----------------------|
| Does a thorough job (cons1)                       | <input type="radio"/> | <input type="radio"/> | <input type="radio"/>          | <input type="radio"/> | <input type="radio"/> |
| Can be somewhat careless (cons2r)                 | <input type="radio"/> | <input type="radio"/> | <input type="radio"/>          | <input type="radio"/> | <input type="radio"/> |
| Is a reliable worker (cons3)                      | <input type="radio"/> | <input type="radio"/> | <input type="radio"/>          | <input type="radio"/> | <input type="radio"/> |
| Tends to be disorganized (cons4r)                 | <input type="radio"/> | <input type="radio"/> | <input type="radio"/>          | <input type="radio"/> | <input type="radio"/> |
| Tends to be lazy (cons5r)                         | <input type="radio"/> | <input type="radio"/> | <input type="radio"/>          | <input type="radio"/> | <input type="radio"/> |
| Perseveres until the task is finished (cons6)     | <input type="radio"/> | <input type="radio"/> | <input type="radio"/>          | <input type="radio"/> | <input type="radio"/> |
| Does things efficiently (cons7)                   | <input type="radio"/> | <input type="radio"/> | <input type="radio"/>          | <input type="radio"/> | <input type="radio"/> |
| Makes plans and follows through with them (cons8) | <input type="radio"/> | <input type="radio"/> | <input type="radio"/>          | <input type="radio"/> | <input type="radio"/> |
| Is easily distracted (cons9r)                     | <input type="radio"/> | <input type="radio"/> | <input type="radio"/>          | <input type="radio"/> | <input type="radio"/> |

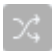



Q88 "I see myself as someone who..."

|                                                        | Strongly disagree (1) | Somewhat disagree (2) | Neither agree nor disagree (3) | Somewhat agree (4)    | Strongly agree (5)    |
|--------------------------------------------------------|-----------------------|-----------------------|--------------------------------|-----------------------|-----------------------|
| Is original, comes up with new ideas (open1)           | <input type="radio"/> | <input type="radio"/> | <input type="radio"/>          | <input type="radio"/> | <input type="radio"/> |
| Is curious about many different things (open2)         | <input type="radio"/> | <input type="radio"/> | <input type="radio"/>          | <input type="radio"/> | <input type="radio"/> |
| Is ingenious, a deep thinker (open3)                   | <input type="radio"/> | <input type="radio"/> | <input type="radio"/>          | <input type="radio"/> | <input type="radio"/> |
| Has an active imagination (open4)                      | <input type="radio"/> | <input type="radio"/> | <input type="radio"/>          | <input type="radio"/> | <input type="radio"/> |
| Is inventive (open5)                                   | <input type="radio"/> | <input type="radio"/> | <input type="radio"/>          | <input type="radio"/> | <input type="radio"/> |
| Values artistic, aesthetic experiences (open6)         | <input type="radio"/> | <input type="radio"/> | <input type="radio"/>          | <input type="radio"/> | <input type="radio"/> |
| Prefers work that is routine (open7r)                  | <input type="radio"/> | <input type="radio"/> | <input type="radio"/>          | <input type="radio"/> | <input type="radio"/> |
| Likes to reflect, play with ideas (open8)              | <input type="radio"/> | <input type="radio"/> | <input type="radio"/>          | <input type="radio"/> | <input type="radio"/> |
| Has few artistic interests (open9r)                    | <input type="radio"/> | <input type="radio"/> | <input type="radio"/>          | <input type="radio"/> | <input type="radio"/> |
| Is sophisticated in art, music, or literature (open10) | <input type="radio"/> | <input type="radio"/> | <input type="radio"/>          | <input type="radio"/> | <input type="radio"/> |

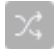

Q90 "I see myself as someone who..."

|                                           | Strongly disagree (1) | Somewhat disagree (2) | Neither agree nor disagree (3) | Somewhat agree (4)    | Strongly agree (5)    |
|-------------------------------------------|-----------------------|-----------------------|--------------------------------|-----------------------|-----------------------|
| Is depressed, blue (neur1)                | <input type="radio"/> | <input type="radio"/> | <input type="radio"/>          | <input type="radio"/> | <input type="radio"/> |
| Is relaxed, handles stress well (neur2r)  | <input type="radio"/> | <input type="radio"/> | <input type="radio"/>          | <input type="radio"/> | <input type="radio"/> |
| Can be tense (neur3)                      | <input type="radio"/> | <input type="radio"/> | <input type="radio"/>          | <input type="radio"/> | <input type="radio"/> |
| Worries a lot (neur4)                     | <input type="radio"/> | <input type="radio"/> | <input type="radio"/>          | <input type="radio"/> | <input type="radio"/> |
| Remains calm in tense situations (neur5r) | <input type="radio"/> | <input type="radio"/> | <input type="radio"/>          | <input type="radio"/> | <input type="radio"/> |
| Gets nervous easily (neur6)               | <input type="radio"/> | <input type="radio"/> | <input type="radio"/>          | <input type="radio"/> | <input type="radio"/> |
| Can be moody (neur7)                      | <input type="radio"/> | <input type="radio"/> | <input type="radio"/>          | <input type="radio"/> | <input type="radio"/> |
| Is emotionally stable (neur8r)            | <input type="radio"/> | <input type="radio"/> | <input type="radio"/>          | <input type="radio"/> | <input type="radio"/> |

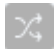

Q92 "I see myself as someone who..."

|                                        | Strongly disagree (1) | Somewhat disagree (2) | Neither agree nor disagree (3) | Somewhat agree (4)    | Strongly agree (5)    |
|----------------------------------------|-----------------------|-----------------------|--------------------------------|-----------------------|-----------------------|
| Is talkative (extra1)                  | <input type="radio"/> | <input type="radio"/> | <input type="radio"/>          | <input type="radio"/> | <input type="radio"/> |
| Is reserved (extra2r)                  | <input type="radio"/> | <input type="radio"/> | <input type="radio"/>          | <input type="radio"/> | <input type="radio"/> |
| Is full of energy (extra3)             | <input type="radio"/> | <input type="radio"/> | <input type="radio"/>          | <input type="radio"/> | <input type="radio"/> |
| Generates a lot of enthusiasm (extra4) | <input type="radio"/> | <input type="radio"/> | <input type="radio"/>          | <input type="radio"/> | <input type="radio"/> |
| Tends to be quiet (extra5r)            | <input type="radio"/> | <input type="radio"/> | <input type="radio"/>          | <input type="radio"/> | <input type="radio"/> |
| Has an assertive personality (extra6)  | <input type="radio"/> | <input type="radio"/> | <input type="radio"/>          | <input type="radio"/> | <input type="radio"/> |
| Is sometimes shy, inhibited (extra7r)  | <input type="radio"/> | <input type="radio"/> | <input type="radio"/>          | <input type="radio"/> | <input type="radio"/> |
| Is outgoing, sociable (extra8)         | <input type="radio"/> | <input type="radio"/> | <input type="radio"/>          | <input type="radio"/> | <input type="radio"/> |

End of Block: BFI-44

Start of Block: Fund Motives

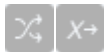

FM We are interested in whether the following statements are true of you in general. Thinking about your current self, please answer how well the statements apply to you. For each item, think about the extent to which you agree or disagree with the statement.











I am not interested in meeting people to flirt with or date (MA3r)

Starting a new romantic/sexual relationship is not a high priority for me (MA4r)

I rarely think about finding a romantic or sexual partner (MA5r)

I would like to find a new romantic/sexual partner soon (MA6r)

---

*Display This Question:*  
*If Are you currently in a romantic relationship? = Yes*

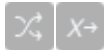

MR .



I wonder if my partner will leave me for someone else (MR\_7)

I worry that other people are interested in my romantic/sexual partner (MR\_8)

I am worried that my partner and I might break up (MR\_9)

It is important to me that my partner is sexually loyal to me (MR\_10)

It is important to me that my partner is emotionally loyal to me (MR\_11)

I do not spend much time and energy doing things to keep my partner invested in our relationship (MR\_12R)

---

*Display This Question:*

*If Do you have any children? = Yes*

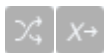

KCKids .



Providing for my children is important to me (Kids\_6)

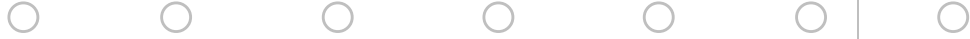

End of Block: Fund Motives

Start of Block: Purpose

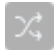

purp Please respond to the following statements.

Not at all   Barely   Fairly   Moderately   Largely   Extremely strongly

1   2   3   4   5   6   7

|                                                   |  |
|---------------------------------------------------|--|
| I feel a sense of my life's purpose. ()           |  |
| I feel a sense of my life's direction. ()         |  |
| I know what I am trying to accomplish in life. () |  |

End of Block: Purpose

Start of Block: Demographics

Q51 Please indicate your level of agreement with the following statements.

|                                                            | Strongly disagree<br>(1) | Moderately disagree<br>(2) | Slightly disagree<br>(3) | Slightly agree (4)    | Moderately agree (5)  | Strongly agree (6)    |
|------------------------------------------------------------|--------------------------|----------------------------|--------------------------|-----------------------|-----------------------|-----------------------|
| I am a religious person (1)                                | <input type="radio"/>    | <input type="radio"/>      | <input type="radio"/>    | <input type="radio"/> | <input type="radio"/> | <input type="radio"/> |
| I am a spiritual person (2)                                | <input type="radio"/>    | <input type="radio"/>      | <input type="radio"/>    | <input type="radio"/> | <input type="radio"/> | <input type="radio"/> |
| I believe that some form of God or higher power exists (3) | <input type="radio"/>    | <input type="radio"/>      | <input type="radio"/>    | <input type="radio"/> | <input type="radio"/> | <input type="radio"/> |

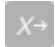



Q32 How would you BEST describe your current religious outlook?

- Atheist (1)
- Agnostic (2)
- Catholic (3)
- Christian (non-Catholic) (4)
- Muslim (6)
- Jewish (7)
- Buddhist (9)
- Spiritual but not Religious (10)
- Hindu (11)
- None (Religious but unaffiliated) (12)
- Other (13) \_\_\_\_\_

---

Page Break

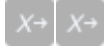

Q20 What is your gender?

- Male (0)
  - Female (1)
  - Neither (3) \_\_\_\_\_
- 

Q22 How would you BEST describe your ethnicity?

- Caucasian or White (1)
- African-American or Black (2)
- Hispanic, Latino, or Chicano (3)
- East Asian (4)
- South Asian (5)
- Middle Eastern (6)
- Multiple (7)
- Other (8) \_\_\_\_\_

## Study 4 Materials

Start of Block: Moderators

Q5 Are you currently seeking a new romantic partner?

- No (1)
  - Yes (2)
  - Prefer not to say (3)
- 

Q7 Do you have any children?

- No (1)
  - Yes (2)
  - Prefer not to say (3)
- 

*Display This Question:*

*If Do you have any children? = Yes*

Q54 How old is your youngest child?

---

*Display This Question:*

*If Do you have any children? = Yes*

Q62 How many children do you have?

---

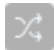

checks Please respond to the following items as you feel in general.

|                                                                    | Not at all<br>(1)     | A tiny<br>amount (2)  | A small<br>amount (3) | A<br>moderate<br>amount (4) | A large<br>amount (5) | An<br>extremely<br>large<br>amount (6) |
|--------------------------------------------------------------------|-----------------------|-----------------------|-----------------------|-----------------------------|-----------------------|----------------------------------------|
| Taking care of my family is important to me. (1)                   | <input type="radio"/> | <input type="radio"/> | <input type="radio"/> | <input type="radio"/>       | <input type="radio"/> | <input type="radio"/>                  |
| Achieving social status, respect, or power is important to me. (2) | <input type="radio"/> | <input type="radio"/> | <input type="radio"/> | <input type="radio"/>       | <input type="radio"/> | <input type="radio"/>                  |
| Finding a new romantic partner is important to me. (3)             | <input type="radio"/> | <input type="radio"/> | <input type="radio"/> | <input type="radio"/>       | <input type="radio"/> | <input type="radio"/>                  |

---

age What is your age in years?

\_\_\_\_\_

**End of Block: Moderators**

---

**Start of Block: inst**

Q65 We are asking you here to write about a given subject for at least two full minutes. In order to qualify for payment, responses should reflect at least two minutes worth of thoughtful writing. We have set a minimum of 200 meaningful words. The written response page will be displayed for two minutes before the survey can be advanced.

Please read the following prompt and then write about the given topic for at least two minutes, for a minimum of 200 words. Answer the questions thoughtfully and authentically, expressing

your true self in writing. After writing for at least two minutes, you can proceed to the rest of the survey.

**Mate Acquisition: [name of condition not displayed to participant]**

What does it mean to be successful in the mating realm? Imagine yourself in the future, having accomplished all of your mating-related goals. Everything has gone as well as it possibly could. You worked hard and succeeded in having your ideal amount of sexual/romantic partners. Now, write about what you imagined **from the perspective of your future self**. Describe what it is like having fully succeeded in the mating realm.

---

---

---

---

---

---

**Control:**

What does it mean when a movie is truly amazing? Imagine having seen the perfect movie. Every aspect of it was as good as it could possibly be and not one thing could be improved. Now, write about the cinematic qualities that made that imaginary movie great **from the perspective of your future self**. Describe what made this a perfect movie for you.

---

---

---

---

---

---

**Kin Care:**

What does it mean to have the ideal family life? Imagine yourself in the future, having accomplished all of your family-related goals. Everything has gone as well as it possibly could. You worked hard and succeeded in building your ideal family. Now, write about what you

imagined **from the perspective of your future self**. Describe what it is like having succeeded in the family realm.

---

---

---

---

---

---

Status:

What does it mean to have high status among other people? Imagine yourself in the future, having accomplished all of your status-related goals. Everything has gone as well as it possibly could. You worked hard and succeeded in building your ideal amount of social status. Now, write about what you imagined **from the perspective of your future self**. Describe what it is like having fully succeeded in the social status realm.

---

---

---

---

---

End of Block: Experiment

---

Start of Block: Purpose

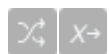

Please indicate how much you possess each of the ideas below in terms of how you feel right now, at this moment. Do not think about the past, the future, or giving the "correct" answer. Let your answers reflect your current mood right now.

|                                                                              | Not at all<br>(1)     | A tiny amount (2)     | A small amount (4)    | A moderate amount (5) | A large amount (6)    | An extremely large amount (7) |
|------------------------------------------------------------------------------|-----------------------|-----------------------|-----------------------|-----------------------|-----------------------|-------------------------------|
| Right now, I feel a sense of my life's purpose. (pil1)                       | <input type="radio"/>         |
| Right now, I feel a sense of my life's direction. (pil2)                     | <input type="radio"/>         |
| Right now, I feel like I know what I am trying to accomplish in life. (pil3) | <input type="radio"/>         |

End of Block: Purpose

---

Start of Block: Demographics

Q51 Please indicate your level of agreement with the following statements.

|                                                            | Strongly disagree<br>(1) | Moderately disagree<br>(2) | Slightly disagree<br>(3) | Slightly agree (4)    | Moderately agree (5)  | Strongly agree (6)    |
|------------------------------------------------------------|--------------------------|----------------------------|--------------------------|-----------------------|-----------------------|-----------------------|
| I am a religious person (1)                                | <input type="radio"/>    | <input type="radio"/>      | <input type="radio"/>    | <input type="radio"/> | <input type="radio"/> | <input type="radio"/> |
| I am a spiritual person (2)                                | <input type="radio"/>    | <input type="radio"/>      | <input type="radio"/>    | <input type="radio"/> | <input type="radio"/> | <input type="radio"/> |
| I believe that some form of God or higher power exists (3) | <input type="radio"/>    | <input type="radio"/>      | <input type="radio"/>    | <input type="radio"/> | <input type="radio"/> | <input type="radio"/> |

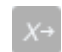



Q32 How would you BEST describe your current religious outlook?

- Atheist (1)
  - Agnostic (2)
  - Catholic (3)
  - Christian (non-Catholic) (4)
  - Muslim (6)
  - Jewish (7)
  - Buddhist (9)
  - Spiritual but not Religious (10)
  - Hindu (11)
  - None (Religious but unaffiliated) (12)
  - Other (13) \_\_\_\_\_
- 

Q34 Please enter your specific religious identity below (e.g., Eastern Orthodox, Pentecostal, etc.)

\_\_\_\_\_

---

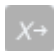

Q36 How would you describe the religious or spiritual outlook in your **childhood home**?

- Anti-religion and spirituality (14)
  - Not religious or spiritual (2)
  - A little religious or spiritual (3)
  - Moderately religious or spiritual (4)
  - Extremely religious or spiritual (5)
- 

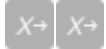

Q20 What is your gender?

- Male (0)
  - Female (1)
  - Neither (3) \_\_\_\_\_
- 

## Study 5 Materials

Are you currently in a committed romantic relationship?

- No (1)
- Yes (2)
- Prefer not to say (3)

End of Block: relationship

---

Start of Block: Approach



Indicate the extent to which you agree or disagree with the following statements using the scale provided.



Select  
"strongly  
disagree" here  
as an attention  
check.  
(AppAvoid\_13)

End of Block: Approach

---

Start of Block: PosAffect

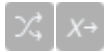

This scale consists of a number of words that describe different feelings and emotions. Read each item and then select the appropriate answer in the space provided. Indicate to what extent you feel this way in general, on average.

|                           | Very slightly<br>or not at all<br>(1) | A little (2)          | Moderately<br>(3)     | Quite a bit<br>(4)    | Extremely (5)         |
|---------------------------|---------------------------------------|-----------------------|-----------------------|-----------------------|-----------------------|
| Interested<br>(PANAS_1)   | <input type="radio"/>                 | <input type="radio"/> | <input type="radio"/> | <input type="radio"/> | <input type="radio"/> |
| Excited<br>(PANAS_3)      | <input type="radio"/>                 | <input type="radio"/> | <input type="radio"/> | <input type="radio"/> | <input type="radio"/> |
| Strong<br>(PANAS_5)       | <input type="radio"/>                 | <input type="radio"/> | <input type="radio"/> | <input type="radio"/> | <input type="radio"/> |
| Enthusiastic<br>(PANAS_9) | <input type="radio"/>                 | <input type="radio"/> | <input type="radio"/> | <input type="radio"/> | <input type="radio"/> |
| Proud<br>(PANAS_10)       | <input type="radio"/>                 | <input type="radio"/> | <input type="radio"/> | <input type="radio"/> | <input type="radio"/> |
| Alert<br>(PANAS_12)       | <input type="radio"/>                 | <input type="radio"/> | <input type="radio"/> | <input type="radio"/> | <input type="radio"/> |
| Inspired<br>(PANAS_14)    | <input type="radio"/>                 | <input type="radio"/> | <input type="radio"/> | <input type="radio"/> | <input type="radio"/> |
| Determined<br>(PANAS_16)  | <input type="radio"/>                 | <input type="radio"/> | <input type="radio"/> | <input type="radio"/> | <input type="radio"/> |
| Attentive<br>(PANAS_17)   | <input type="radio"/>                 | <input type="radio"/> | <input type="radio"/> | <input type="radio"/> | <input type="radio"/> |
| Active<br>(PANAS_19)      | <input type="radio"/>                 | <input type="radio"/> | <input type="radio"/> | <input type="radio"/> | <input type="radio"/> |

End of Block: PosAffect

Start of Block: Promo

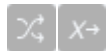

Indicate the extent to which the following statements are true or untrue of you using the scale provided.





I see myself as someone who is primarily striving to reach my “ideal self”—to fulfill my hopes, wishes, and aspirations.  
(Q82\_29)

In general, I am focused on achieving positive outcomes in my life.  
(Q82\_31)

I often imagine myself experiencing good things that I hope will happen to me.  
(Q82\_33)

Overall, I am more oriented toward achieving success than preventing failure.  
(Q82\_34)

End of Block: Promo

Start of Block: big5

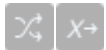

Here are a number of personality traits that may or may not apply to you. Please indicate the extent to which you agree or disagree with each statement. You should rate the extent to which the pair of traits applies to you in general, even if one characteristic applies more strongly than the other.

|                                           | Not at all like me (1) | Not much like me (2)  | Somewhat like me (3)  | Quite a lot like me (4) | Just like me (5)      |
|-------------------------------------------|------------------------|-----------------------|-----------------------|-------------------------|-----------------------|
| Extraverted, enthusiastic (big5e1)        | <input type="radio"/>  | <input type="radio"/> | <input type="radio"/> | <input type="radio"/>   | <input type="radio"/> |
| Critical, quarrelsome (big5a1r)           | <input type="radio"/>  | <input type="radio"/> | <input type="radio"/> | <input type="radio"/>   | <input type="radio"/> |
| Dependable, self-disciplined (big5c1)     | <input type="radio"/>  | <input type="radio"/> | <input type="radio"/> | <input type="radio"/>   | <input type="radio"/> |
| Anxious, easily upset (big5n1)            | <input type="radio"/>  | <input type="radio"/> | <input type="radio"/> | <input type="radio"/>   | <input type="radio"/> |
| Open to new experiences, complex (big5o1) | <input type="radio"/>  | <input type="radio"/> | <input type="radio"/> | <input type="radio"/>   | <input type="radio"/> |
| Reserved, quiet (big5e1r)                 | <input type="radio"/>  | <input type="radio"/> | <input type="radio"/> | <input type="radio"/>   | <input type="radio"/> |
| Sympathetic, warm (big5a2)                | <input type="radio"/>  | <input type="radio"/> | <input type="radio"/> | <input type="radio"/>   | <input type="radio"/> |
| Disorganized, careless (big5c2r)          | <input type="radio"/>  | <input type="radio"/> | <input type="radio"/> | <input type="radio"/>   | <input type="radio"/> |
| Calm, emotionally stable (big5n2r)        | <input type="radio"/>  | <input type="radio"/> | <input type="radio"/> | <input type="radio"/>   | <input type="radio"/> |
| Conventional, uncreative (big5o2r)        | <input type="radio"/>  | <input type="radio"/> | <input type="radio"/> | <input type="radio"/>   | <input type="radio"/> |

End of Block: big5

**Start of Block: Experiment**

Page Break

---

Timing

First Click (1)

Last Click (2)

Page Submit (3)

Click Count (4)

-----

Page Break

---

What does it mean to be successful in the mating realm? Imagine yourself in the future, having accomplished all of your mating-related goals. Everything has gone as well as it possibly could. You worked hard and succeeded in having your ideal amount of romantic/sexual partners. Now, write about what you imagined **from the perspective of your future self**. Describe what it is like having fully succeeded in the mating realm.

---

---

---

---

---

---

What does it mean when a movie is truly amazing? Imagine having seen the perfect movie. Every aspect of it was as good as it could possibly be and not one thing could be improved. Now, write about the cinematic qualities that made that imaginary movie great **from the perspective of your future self**. Describe what made this a perfect movie for you.

---

---

---

---

---

---

What does it mean to have the ideal family life? Imagine yourself in the future, having accomplished all of your family-related goals. Everything has gone as well as it possibly could. You worked hard and succeeded in building your ideal family. Now, write about what you imagined **from the perspective of your future self**. Describe what it is like having succeeded in the family realm.

---

---

---

---

---

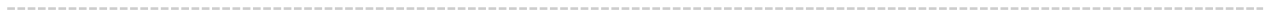

What does it mean to have high status among other people? Imagine yourself in the future, having accomplished all of your status-related goals. Everything has gone as well as it possibly could. You worked hard and succeeded in building your ideal amount of social status. Now, write about what you imagined **from the perspective of your future self**. Describe what it is like having fully succeeded in the social status realm.

---

---

---

---

---

End of Block: Experiment

---

Start of Block: Purpose

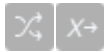

Please indicate how much you possess each of the ideas below in terms of how you feel ***right now, at this moment***. Do not think about the past, the future, or giving the "correct" answer. Let your answers reflect your current mood right now.

|                                                                              | Not at all<br>(1)     | A tiny amount (2)     | A small amount (3)    | A moderate amount (4) | A large amount (5)    | An extremely large amount (6) |
|------------------------------------------------------------------------------|-----------------------|-----------------------|-----------------------|-----------------------|-----------------------|-------------------------------|
| Right now, I feel a sense of my life's purpose. (pil1)                       | <input type="radio"/>         |
| Right now, I feel a sense of my life's direction. (pil2)                     | <input type="radio"/>         |
| Right now, I feel like I know what I am trying to accomplish in life. (pil3) | <input type="radio"/>         |





End of Block: Purpose

---

Start of Block: Demographics

Please indicate your level of agreement with the following statements.

|                                                            | Strongly disagree<br>(1) | Moderately disagree<br>(2) | Slightly disagree<br>(3) | Slightly agree (4)    | Moderately agree (5)  | Strongly agree (6)    |
|------------------------------------------------------------|--------------------------|----------------------------|--------------------------|-----------------------|-----------------------|-----------------------|
| I am a religious person (1)                                | <input type="radio"/>    | <input type="radio"/>      | <input type="radio"/>    | <input type="radio"/> | <input type="radio"/> | <input type="radio"/> |
| I am a spiritual person (2)                                | <input type="radio"/>    | <input type="radio"/>      | <input type="radio"/>    | <input type="radio"/> | <input type="radio"/> | <input type="radio"/> |
| I believe that some form of God or higher power exists (3) | <input type="radio"/>    | <input type="radio"/>      | <input type="radio"/>    | <input type="radio"/> | <input type="radio"/> | <input type="radio"/> |

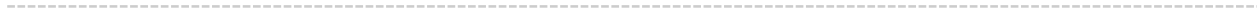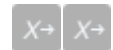

What is your gender?

- Male (0)
- Female (1)
- Neither (3) \_\_\_\_\_

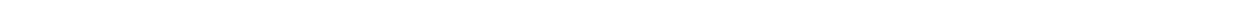

How would you BEST describe your ethnicity?

- Caucasian or White (1)
  - African-American or Black (2)
  - Hispanic, Latino, or Chicano (3)
  - East Asian (4)
  - South Asian (5)
  - Middle Eastern (6)
  - Multiple (7)
  - Other (8) \_\_\_\_\_
- 

How would you describe your social economic class?

- Lower or working poor class (1)
  - Lower middle class (2)
  - Middle class (3)
  - Upper middle class (4)
  - Upper class (5)
- 

Do you have any children?

- No (1)
  - Yes (2)
  - Prefer not to say (3)
-

*Display This Question:*

*If Do you have any children? = Yes*

How old is your youngest child?

---

*Display This Question:*

*If Do you have any children? = Yes*

How many children do you have?

---

What is your age in years?

---
